# Supplementary material
Source: bioRxiv or medRxiv preprint supplement (https://www.biorxiv.org/highwire/filestream/60229/field_highwire_adjunct_files/3/197855-2.pdf)

Supplemental Figure 1

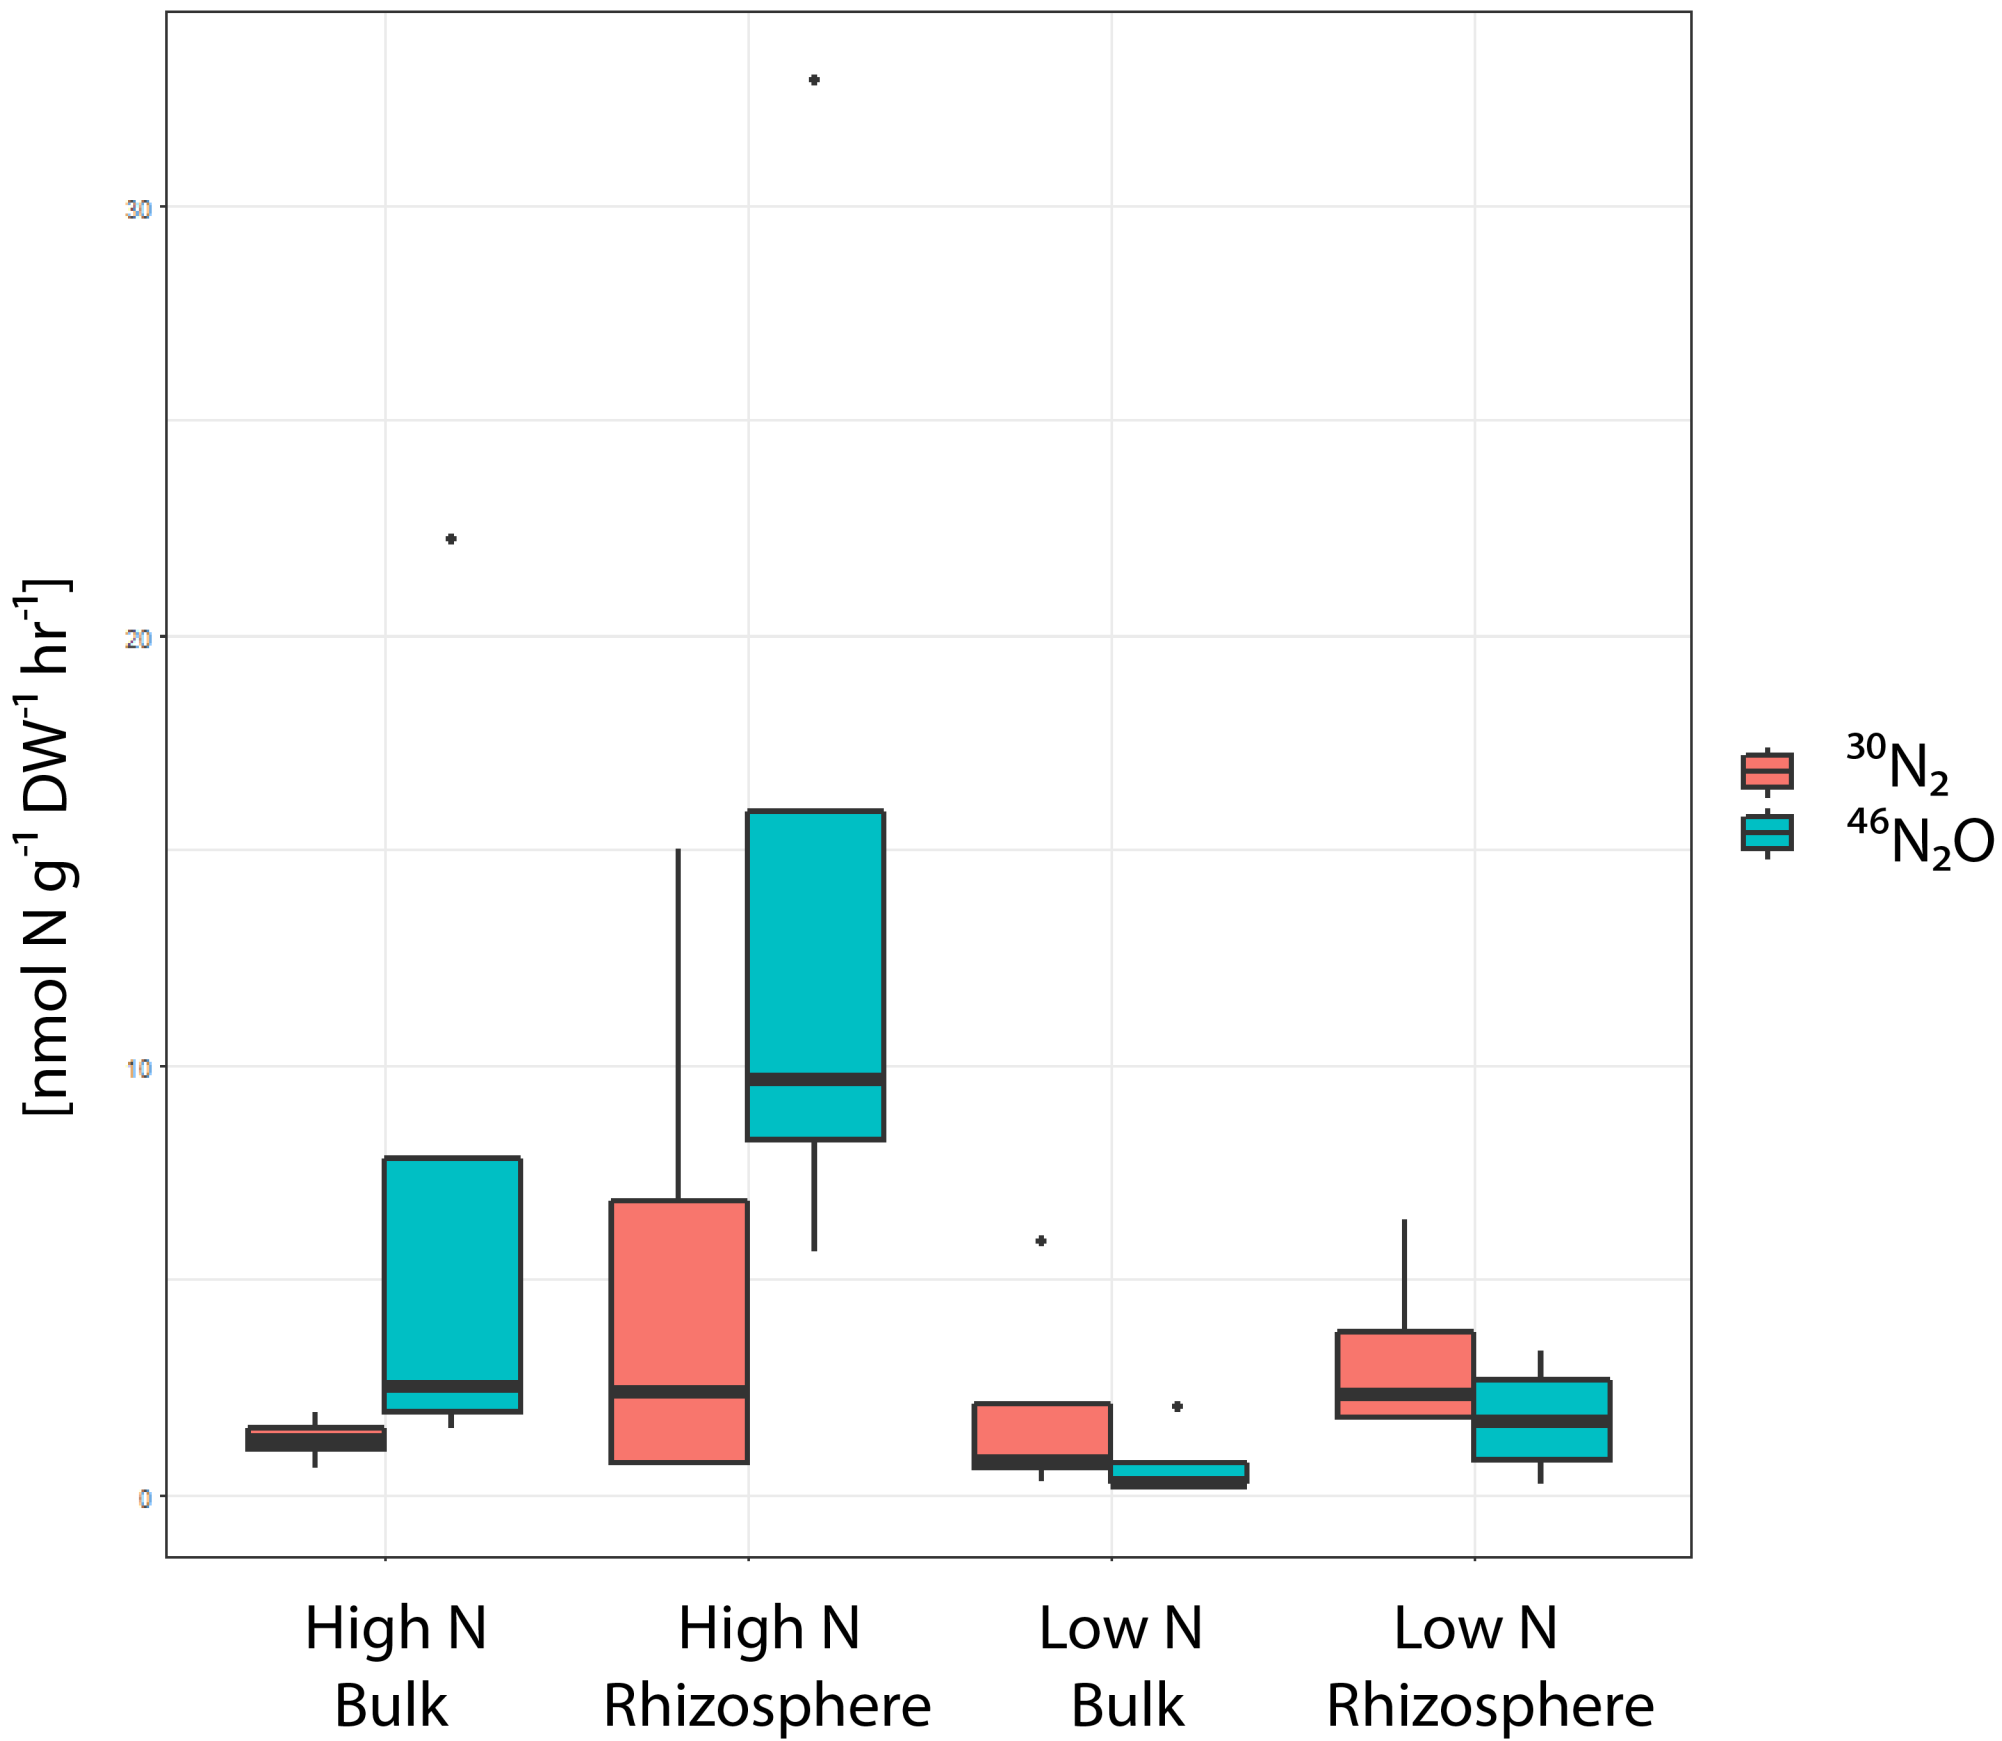

Supplement: Supplementary file [file 197855-2.pdf]
